# Supplementary material for: Adipose Mesenchymal Stromal Cell-Derived Exosomes Carrying MiR-122-5p Antagonize the Inhibitory Effect of Dihydrotestosterone on Hair Follicles by Targeting the TGF-β1/SMAD3 Signaling Pathway
Source: MDPI journal article supplement (doi:10.3390/ijms24065703), 2023-03-16
Supplement: s1 [file s1]

## Supplementary Materials for

### **Adipose Mesenchymal Stem Cells Derived Exosomes Carrying MiR-122-5p Antagonize the Inhibitory Effect of Dihydrotestosterone on Hair Follicles by Targeting the TGF- $\beta$ 1/SMAD3 Signaling Pathway**

Yunxiao Liang<sup>1†</sup>, Xin Tang<sup>1†</sup>, Xue Zhang<sup>2</sup>, Cuixiang Cao<sup>1</sup>, MiaoYu<sup>1</sup>, Miaojian Wan<sup>1\*</sup>

\* Correspondence: E-mail: wanmj@mail.sysu.edu.cn

#### **This file includes:**

Figures: Figure S1- Figure S4

Tables: Additional table S1 and Additional table S2

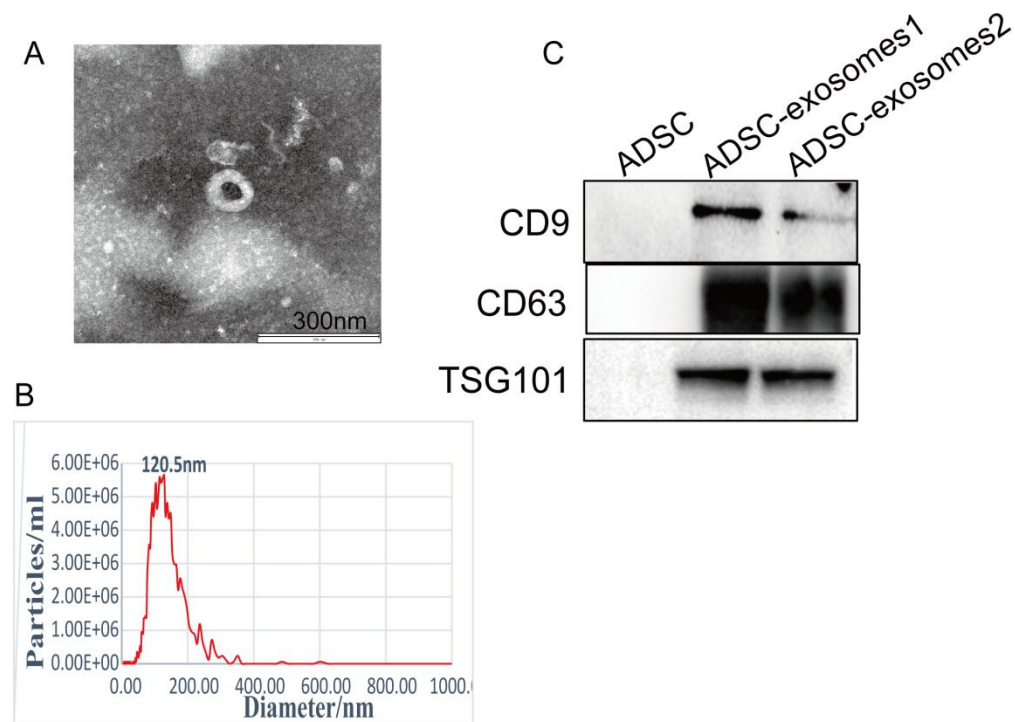

**Figure. S1**

The ADSC-Exosomes were harvested from conditioned media collected from cells that cultured on both exosome-depleted FBS (ADSC-exosomes1) and FBS (ADSC-exosomes2). (A) The Morphology of ADSC-Exosomes were deprived from conditioned media added with full FBS and observed by transmission electron microscopy (Bar=300nm). (B) Particle size concentration and distribution of ADSC-Exosomes from adding full FBS conditioned media detected by nanoparticle tracking analysis. (C) Western blotting was conducted to assess the protein levels of CD9,CD63 and TSG101 in terms with ADSC-Exosomes harvested from conditioned media collected from cells that cultured on both exosome-depleted FBS and FBS.

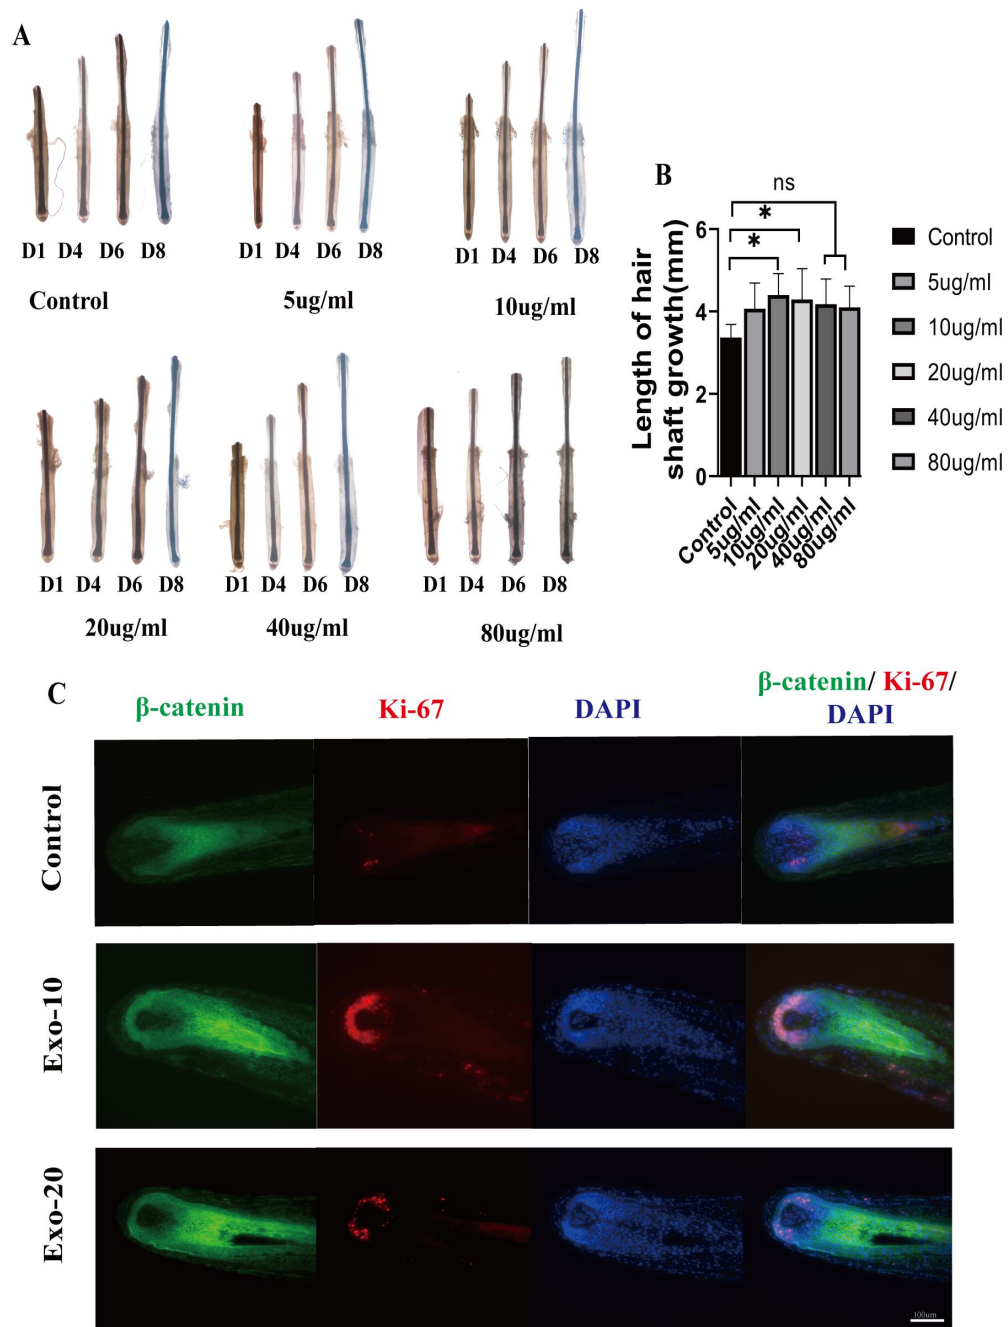

**Figure S2**

**Growth-promoting effect of Exos on hair follicles cultured in vitro.**

Continuous photomicrographs of hair follicles co-cultured with different concentrations of Exos. Hair follicles in the growth period were randomly divided into groups and photographed every two days. (B) Statistical analysis was conducted on the measured length of hair growth before entering catagen. (C)

Immunofluorescence staining of Ki67 in the hair matrix and ORS regions and β-catenin in the hair matrix, IRS, and ORS regions of HF's on day 8 (Bar=100 μm).

\*p<0.05.

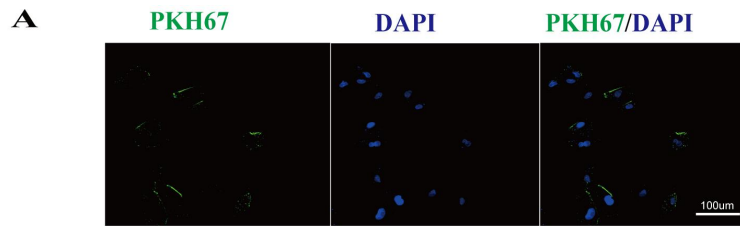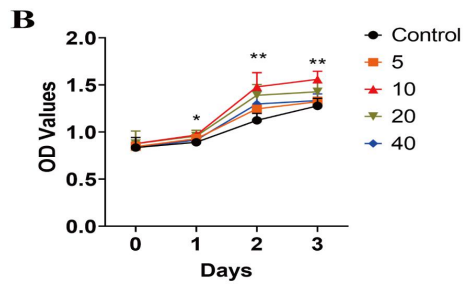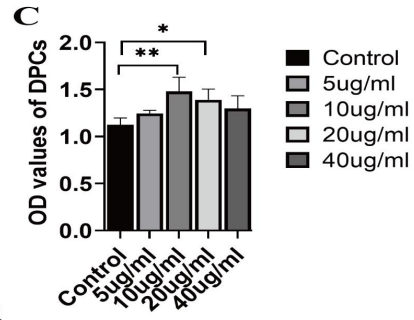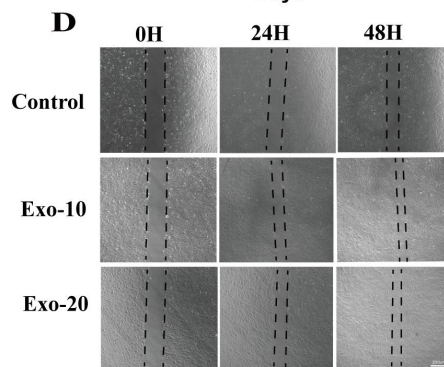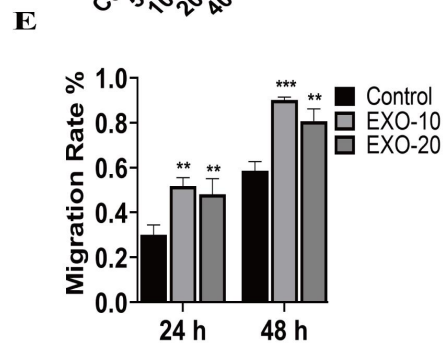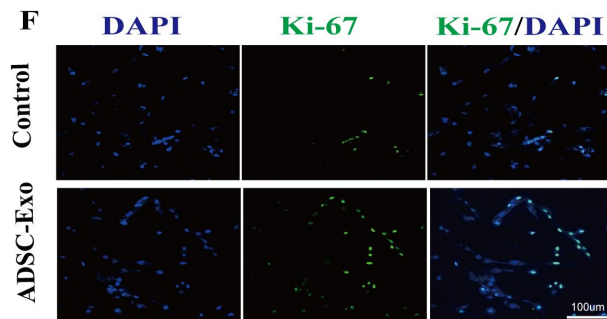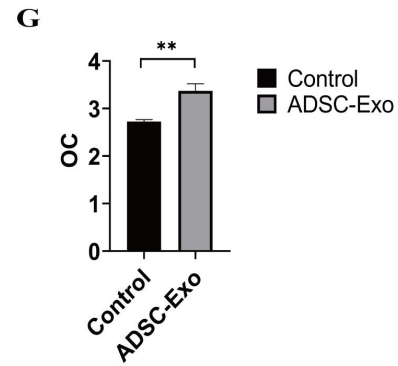

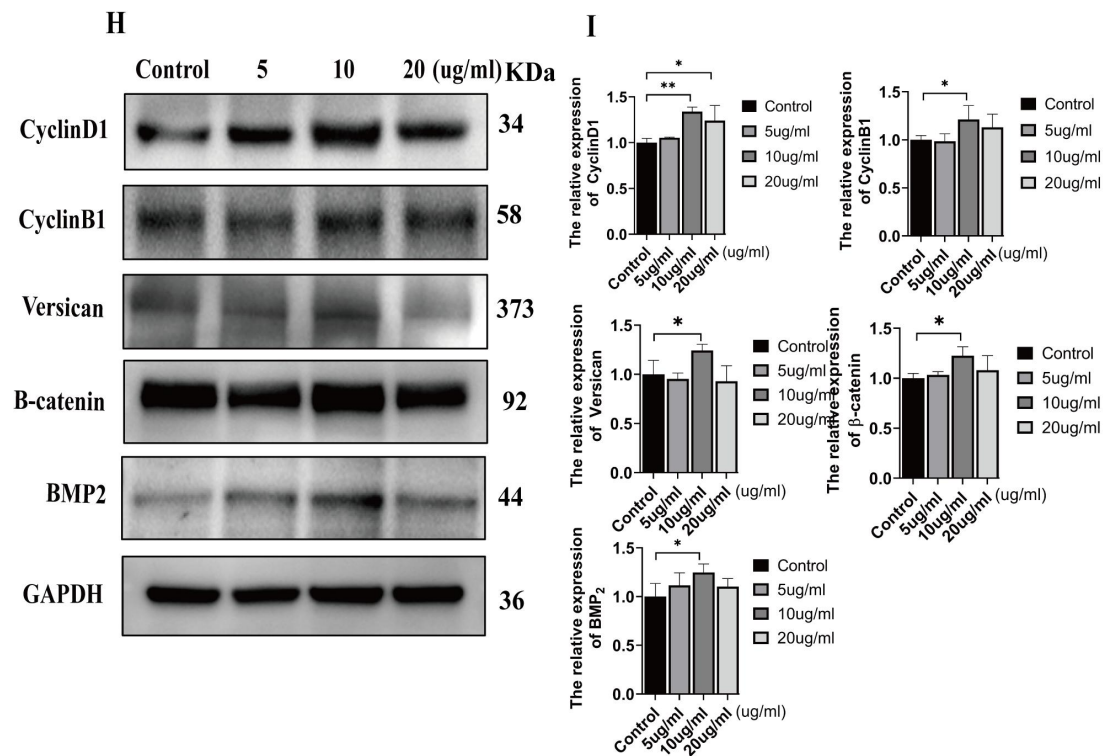

**Figure. S3**

**ADSC-Exos stimulate DPCs proliferation and migration.**

(A) PKH67-labeled ADSC-Exos internalized by DPCs (Bar=100  $\mu$ m). (B, C) DPCs were treated with ADSC-Exos, and cell proliferation was detected by CCK-8 analysis. After incubation for 1 day, the number of DPCs increased and was highly significant after 2 days (Bar=200  $\mu$ m). (D, E) DPCs were incubated with an appropriate concentration of ADSC-Exos and the mobility rate was detected by the cell migration scratch test (Bar=100  $\mu$ m). (F, G) Immunofluorescence staining of Ki67 in DPCs treated with ADSC-Exos and the quantitative statistical analysis of the percentage of Ki67+. (Bar=100 $\mu$ m) (H, I) The relative protein expression of cyclin and growth regulatory proteins in DPCs treated with ADSC-Exos were analyzed by Western blotting. DPCs treated with PBS were used as controls. Data are represented as means  $\pm$  SD. \*p < 0.05, \*\*p < 0.01.

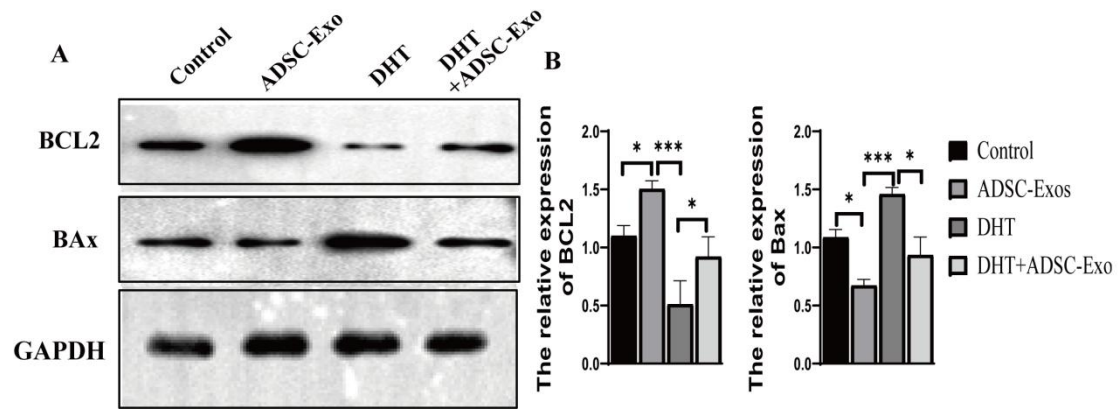

**Figure. S4**

**ADSC-Exo mitigated the inhibitory effect of DHT( $10^{-5}$ mol/L) on DPCs.**

In the DPCs induced by DHT ( $10^{-5}$  mol/L), ADSC-Exos can upregulate BCL2 expression and downregulate Bax expression. Data are represented as means  $\pm$  SEM.

\* $p < 0.05$ , \*\* $p < 0.01$ , \*\*\* $P < 0.001$

**Additional Table S1****The miRNAs were detected in the sample consensus expression.**

| tracking_id     | EX01     | EX02      | EX03      |
|-----------------|----------|-----------|-----------|
| hsa-miR-148a-3p | 80140.38 | 73007.03  | 91707.28  |
| hsa-let-7b-5p   | 74258.07 | 65710.51  | 110957.99 |
| hsa-miR-486-5p  | 47157.39 | 103028.62 | 47608.22  |
| hsa-let-7i-5p   | 47077.07 | 22878.23  | 33102.7   |
| hsa-miR-122-5p  | 39946.61 | 45241.24  | 19705.34  |
| hsa-miR-423-5p  | 35868.54 | 52746.64  | 64813.1   |
| hsa-miR-99a-5p  | 32037.62 | 16055.14  | 19463.82  |
| hsa-miR-100-5p  | 31197.29 | 23449.14  | 27078.86  |
| hsa-miR-615-3p  | 28651.58 | 15372.83  | 33599.95  |
| hsa-miR-21-5p   | 27854.5  | 16347.56  | 17560.06  |
| hsa-miR-125b-5p | 27218.08 | 16013.36  | 17531.64  |
| hsa-miR-10b-5p  | 26952.38 | 31595.07  | 23157.69  |
| hsa-miR-423-3p  | 25308.79 | 10471.35  | 30062.37  |
| hsa-miR-10a-5p  | 24165.69 | 24451.72  | 16707.63  |
| hsa-miR-26a-5p  | 23652.84 | 13868.96  | 16395.08  |
| hsa-miR-125a-5p | 21230.71 | 14620.9   | 27149.9   |
| hsa-miR-4488    | 19902.25 | 25147.95  | 14718.63  |
| hsa-miR-199b-3p | 19889.88 | 9399.15   | 13851.99  |
| hsa-miR-199a-3p | 19889.88 | 9399.15   | 13851.99  |
| hsa-miR-92a-3p  | 18524.36 | 20970.55  | 27547.71  |
| hsa-miR-143-3p  | 18345.17 | 12866.39  | 13823.58  |
| hsa-miR-24-3p   | 16856.06 | 9385.23   | 11110     |
| hsa-miR-1246    | 14112.62 | 11195.43  | 3935.39   |
| hsa-miR-27a-3p  | 12234.23 | 6837.01   | 6435.85   |
| hsa-miR-128-3p  | 12172.44 | 9510.55   | 12829.07  |
| hsa-miR-151a-3p | 12036.5  | 9162.43   | 12374.44  |
| hsa-let-7a-5p   | 10621.53 | 9970.06   | 2003.22   |
| hsa-miR-222-3p  | 10034.54 | 6280.03   | 6421.64   |
| hsa-miR-3960    | 9867.71  | 3898.91   | 5384.52   |
| hsa-miR-320a-3p | 9101.53  | 17712.18  | 12630.17  |
| hsa-miR-320b    | 8601.03  | 9608.02   | 17702.13  |
| hsa-let-7c-5p   | 7668.02  | 2478.59   | 3367.1    |
| hsa-miR-92b-3p  | 7124.28  | 7435.77   | 23768.59  |
| hsa-miR-409-3p  | 6988.34  | 6516.74   | 10911.11  |
| hsa-miR-320c    | 6110.94  | 5305.3    | 14235.58  |
| hsa-miR-30d-5p  | 5919.39  | 6850.94   | 6052.25   |
| hsa-miR-328-3p  | 5425.08  | 3592.56   | 10470.68  |
| hsa-miR-22-3p   | 4671.25  | 4372.35   | 4006.42   |

|                   |         |         |         |
|-------------------|---------|---------|---------|
| hsa-miR-543       | 4306.7  | 2506.44 | 2429.43 |
| hsa-let-7d-3p     | 4214.01 | 3425.47 | 6677.37 |
| hsa-miR-193a-5p   | 4084.26 | 2840.63 | 4915.68 |
| hsa-miR-127-3p    | 4016.29 | 1991.23 | 5540.8  |
| hsa-miR-29a-3p    | 3960.68 | 1949.45 | 2713.57 |
| hsa-miR-7704      | 3960.68 | 710.16  | 866.64  |
| hsa-miR-320d      | 3830.92 | 3481.17 | 8240.16 |
| hsa-miR-99b-5p    | 3806.2  | 2701.39 | 4617.33 |
| hsa-miR-221-3p    | 3719.7  | 2715.31 | 4390.02 |
| hsa-miR-199a-5p   | 3657.92 | 835.48  | 3267.64 |
| hsa-miR-224-5p    | 3552.87 | 4205.25 | 4461.05 |
| hsa-miR-191-5p    | 3219.21 | 2743.16 | 2543.08 |
| hsa-miR-10396a-5p | 3033.84 | 696.24  | 255.72  |
| hsa-miR-424-3p    | 2879.37 | 1406.39 | 2628.33 |
| hsa-miR-25-3p     | 2681.64 | 2771.01 | 2315.77 |
| hsa-miR-370-3p    | 2632.21 | 236.72  | 2159.49 |
| hsa-miR-27b-3p    | 2514.81 | 1225.37 | 923.47  |
| hsa-miR-218-5p    | 2471.56 | 1587.42 | 312.56  |
| hsa-miR-146b-5p   | 2465.38 | 2158.32 | 4034.84 |
| hsa-let-7g-5p     | 2422.13 | 1197.52 | 1136.57 |
| hsa-miR-4516      | 2168.8  | 543.06  | 2514.67 |
| hsa-let-7f-5p     | 2107.01 | 2214.02 | 795.6   |
| hsa-miR-181a-5p   | 2063.76 | 1643.12 | 994.5   |
| hsa-miR-125b-1-3p | 1946.35 | 1643.11 | 2401.01 |
| hsa-miR-1290      | 1915.46 | 3244.45 | 738.77  |
| hsa-miR-30c-5p    | 1828.96 | 1420.32 | 1648.04 |
| hsa-miR-6529-5p   | 1637.41 | 1601.34 | 1719.07 |
| hsa-miR-381-3p    | 1575.62 | 1169.67 | 3054.54 |
| hsa-miR-619-5p    | 1557.08 | 570.91  | 539.87  |
| hsa-miR-10396b-5p | 1526.19 | 348.12  | 127.86  |
| hsa-miR-1291      | 1421.15 | 167.1   | 767.19  |
| hsa-miR-4508      | 1408.79 | 654.46  | 255.73  |
| hsa-miR-27a-5p    | 1384.07 | 654.46  | 1292.85 |
| hsa-let-7b-3p     | 1371.72 | 821.56  | 2429.43 |
| hsa-miR-3195      | 1371.72 | 153.17  | 752.98  |
| hsa-miR-485-5p    | 1353.18 | 1294.99 | 2273.15 |
| hsa-miR-214-3p    | 1328.46 | 863.33  | 1846.93 |
| hsa-miR-532-5p    | 1279.03 | 1002.58 | 539.87  |
| hsa-miR-196a-5p   | 1235.78 | 682.31  | 539.87  |
| hsa-miR-382-5p    | 1186.35 | 431.66  | 653.53  |
| hsa-miR-4466      | 1180.17 | 654.46  | 4787.82 |
| hsa-miR-155-5p    | 1143.1  | 584.84  | 198.9   |
| hsa-miR-146a-5p   | 1056.59 | 459.51  | 170.49  |



|                 |         |         |         |
|-----------------|---------|---------|---------|
| hsa-miR-30a-5p  | 1031.88 | 1086.12 | 1093.95 |
| hsa-miR-941     | 1019.5  | 1392.45 | 4191.1  |
| hsa-miR-193b-5p | 994.8   | 1531.71 | 2969.3  |
| hsa-miR-503-5p  | 982.45  | 473.44  | 1960.59 |
| hsa-miR-493-3p  | 976.27  | 487.36  | 483.04  |
| hsa-miR-92b-5p  | 963.91  | 459.51  | 1875.35 |
| hsa-miR-1307-3p | 951.55  | 626.61  | 2315.77 |
| hsa-miR-197-3p  | 920.66  | 696.23  | 1378.1  |
| hsa-miR-432-5p  | 914.48  | 584.84  | 724.57  |
| hsa-miR-101-3p  | 877.4   | 919.02  | 397.8   |
| hsa-miR-126-3p  | 834.15  | 1127.9  | 994.5   |
| hsa-miR-152-3p  | 834.15  | 375.97  | 582.49  |
| hsa-miR-181b-5p | 815.62  | 417.74  | 340.98  |
| hsa-miR-654-3p  | 735.29  | 556.99  | 1150.78 |
| hsa-miR-4497    | 735.29  | 111.4   | 269.94  |
| hsa-let-7a-3p   | 729.12  | 668.38  | 852.44  |
| hsa-miR-744-5p  | 704.4   | 612.69  | 824.02  |
| hsa-miR-186-5p  | 642.61  | 501.29  | 525.67  |
| hsa-miR-28-3p   | 611.71  | 431.66  | 696.15  |
| hsa-miR-192-5p  | 605.53  | 487.36  | 596.7   |
| hsa-miR-484     | 593.17  | 403.82  | 568.29  |
| hsa-miR-22-5p   | 587     | 445.59  | 142.07  |
| hsa-miR-148b-3p | 562.28  | 696.23  | 653.53  |
| hsa-miR-1228-5p | 543.74  | 55.7    | 1676.45 |
| hsa-miR-574-3p  | 531.39  | 362.04  | 1065.54 |
| hsa-miR-493-5p  | 519.03  | 306.34  | 951.88  |
| hsa-miR-296-3p  | 494.31  | 167.1   | 1903.76 |
| hsa-miR-214-5p  | 488.13  | 445.59  | 355.18  |
| hsa-miR-671-3p  | 488.13  | 334.19  | 937.67  |
| hsa-miR-625-3p  | 469.6   | 334.19  | 966.09  |
| hsa-miR-24-2-5p | 469.6   | 97.47   | 241.52  |
| hsa-miR-103a-3p | 451.06  | 779.78  | 142.08  |
| hsa-miR-30a-3p  | 432.52  | 222.79  | 426.22  |
| hsa-miR-134-5p  | 420.17  | 320.27  | 397.8   |
| hsa-miR-485-3p  | 413.99  | 724.08  | 1008.71 |
| hsa-miR-654-5p  | 407.81  | 236.72  | 312.56  |
| hsa-miR-26b-5p  | 401.63  | 111.4   | 412.01  |
| hsa-miR-221-5p  | 395.45  | 153.17  | 511.46  |
| hsa-miR-378a-3p | 370.73  | 738.01  | 497.25  |
| hsa-miR-23a-3p  | 370.73  | 222.79  | 142.07  |
| hsa-miR-495-3p  | 364.56  | 236.72  | 468.84  |
| hsa-miR-130b-5p | 364.56  | 153.17  | 284.14  |
| hsa-miR-299-3p  | 364.56  | 139.25  | 596.7   |

|                  |        |         |         |
|------------------|--------|---------|---------|
| hsa-miR-99b-3p   | 327.48 | 125.32  | 525.67  |
| hsa-miR-10400-5p | 308.95 | 459.51  | 142.07  |
| hsa-miR-145-3p   | 308.95 | 431.66  | 227.31  |
| hsa-miR-7706     | 296.59 | 389.89  | 156.28  |
| hsa-let-7e-5p    | 290.41 | 181.02  | 156.28  |
| hsa-miR-125a-3p  | 290.41 | 139.25  | 71.04   |
| hsa-miR-9901     | 278.05 | 292.42  | 56.83   |
| hsa-miR-106b-3p  | 259.51 | 334.19  | 142.07  |
| hsa-miR-7-5p     | 259.5  | 1002.57 | 653.53  |
| hsa-miR-140-3p   | 240.98 | 877.25  | 198.9   |
| hsa-miR-1180-3p  | 240.98 | 389.89  | 198.9   |
| hsa-miR-342-5p   | 240.98 | 27.85   | 56.83   |
| hsa-miR-379-5p   | 222.44 | 97.47   | 113.66  |
| hsa-miR-574-5p   | 222.44 | 55.7    | 426.22  |
| hsa-miR-365b-3p  | 222.44 | 27.84   | 880.84  |
| hsa-miR-365a-3p  | 222.44 | 27.84   | 880.84  |
| hsa-miR-4492     | 210.08 | 41.77   | 156.28  |
| hsa-miR-210-3p   | 203.9  | 125.32  | 14.21   |
| hsa-miR-323a-3p  | 191.55 | 97.47   | 426.22  |
| hsa-miR-199b-5p  | 185.37 | 13.92   | 312.56  |
| hsa-miR-129-5p   | 185.36 | 556.98  | 369.38  |
| hsa-miR-93-5p    | 179.19 | 487.36  | 71.04   |
| hsa-miR-17-5p    | 173.01 | 125.32  | 14.21   |
| hsa-let-7d-5p    | 166.83 | 264.57  | 99.45   |
| hsa-miR-132-3p   | 160.65 | 97.47   | 184.69  |
| hsa-miR-342-3p   | 154.47 | 208.87  | 213.11  |
| hsa-miR-10a-3p   | 154.47 | 69.62   | 28.41   |
| hsa-miR-20a-5p   | 148.29 | 292.42  | 28.41   |
| hsa-miR-615-5p   | 148.29 | 55.7    | 397.8   |
| hsa-miR-30e-5p   | 142.11 | 334.19  | 14.21   |
| hsa-miR-365a-5p  | 135.94 | 167.1   | 468.84  |
| hsa-miR-455-5p   | 135.94 | 125.32  | 1491.75 |
| hsa-miR-149-5p   | 135.94 | 125.32  | 596.7   |
| hsa-miR-29b-3p   | 135.94 | 27.84   | 56.82   |
| hsa-miR-142-5p   | 129.76 | 724.08  | 142.07  |
| hsa-miR-1468-5p  | 129.76 | 153.17  | 113.66  |
| hsa-miR-16-2-3p  | 117.4  | 1281.07 | 85.24   |
| hsa-miR-629-5p   | 117.4  | 473.44  | 184.69  |
| hsa-miR-20b-5p   | 117.4  | 306.34  | 14.21   |
| hsa-miR-361-3p   | 117.4  | 222.79  | 355.18  |
| hsa-miR-412-5p   | 117.4  | 181.02  | 14.21   |
| hsa-miR-664a-5p  | 117.4  | 55.7    | 28.41   |
| hsa-miR-194-5p   | 105.04 | 445.58  | 28.42   |

|                   |        |        |        |
|-------------------|--------|--------|--------|
| hsa-miR-433-3p    | 105.04 | 250.64 | 156.28 |
| hsa-miR-760       | 105.04 | 153.17 | 28.41  |
| hsa-miR-411-5p    | 105.04 | 111.4  | 113.66 |
| hsa-miR-4324      | 105.04 | 69.62  | 99.45  |
| hsa-miR-452-5p    | 105.04 | 13.92  | 184.69 |
| hsa-miR-98-5p     | 92.68  | 83.55  | 170.49 |
| hsa-miR-125b-2-3p | 92.68  | 41.77  | 14.21  |
| hsa-miR-330-3p    | 92.68  | 13.92  | 85.24  |
| hsa-miR-340-5p    | 86.5   | 111.4  | 142.07 |
| hsa-miR-6089      | 86.5   | 27.84  | 85.24  |
| hsa-miR-10401-3p  | 86.5   | 13.92  | 355.18 |
| hsa-miR-1908-5p   | 86.5   | 13.92  | 127.86 |
| hsa-miR-2110      | 80.33  | 139.25 | 71.04  |
| hsa-miR-365b-5p   | 80.33  | 55.7   | 99.45  |
| hsa-miR-3615      | 74.15  | 946.88 | 170.49 |
| hsa-miR-4671-5p   | 74.15  | 55.7   | 170.49 |
| hsa-miR-665       | 74.15  | 55.7   | 142.07 |
| hsa-miR-204-3p    | 74.15  | 55.7   | 127.86 |
| hsa-miR-25-5p     | 74.15  | 27.85  | 56.83  |
| hsa-miR-4800-3p   | 67.97  | 69.62  | 99.45  |
| hsa-miR-1249-3p   | 67.97  | 55.7   | 42.62  |
| hsa-miR-10b-3p    | 67.97  | 27.85  | 198.9  |
| hsa-miR-330-5p    | 61.79  | 13.92  | 71.04  |
| hsa-miR-23a-5p    | 61.79  | 13.92  | 71.04  |
| hsa-miR-329-3p    | 61.78  | 194.94 | 340.98 |
| hsa-miR-5100      | 55.61  | 13.92  | 42.62  |
| hsa-miR-339-3p    | 49.43  | 139.25 | 56.83  |
| hsa-miR-320e      | 49.43  | 97.47  | 14.21  |
| hsa-miR-339-5p    | 49.43  | 69.62  | 14.21  |
| hsa-miR-1301-3p   | 49.43  | 13.92  | 269.94 |
| hsa-miR-1271-5p   | 49.43  | 13.92  | 14.21  |
| hsa-miR-1260b     | 43.25  | 55.7   | 28.41  |
| hsa-miR-501-3p    | 37.07  | 153.17 | 14.21  |
| hsa-miR-584-5p    | 37.07  | 41.77  | 14.21  |
| hsa-miR-675-5p    | 37.07  | 13.92  | 99.45  |
| hsa-miR-323b-3p   | 30.89  | 83.55  | 56.83  |
| hsa-miR-34b-3p    | 30.89  | 41.77  | 156.28 |
| hsa-miR-28-5p     | 30.89  | 27.85  | 99.45  |
| hsa-miR-1260a     | 30.89  | 27.85  | 28.41  |
| hsa-miR-6858-5p   | 30.89  | 13.92  | 170.49 |
| hsa-miR-140-5p    | 24.72  | 83.55  | 113.66 |
| hsa-miR-378i      | 24.72  | 41.77  | 28.41  |
| hsa-miR-6750-5p   | 24.72  | 13.92  | 14.21  |

|                 |       |        |        |
|-----------------|-------|--------|--------|
| hsa-miR-4429    | 24.72 | 13.92  | 14.21  |
| hsa-miR-204-5p  | 18.54 | 55.7   | 284.14 |
| hsa-miR-6131    | 18.54 | 41.77  | 28.41  |
| hsa-miR-34a-5p  | 18.54 | 41.77  | 14.21  |
| hsa-miR-106b-5p | 18.54 | 27.85  | 170.49 |
| hsa-miR-3158-3p | 12.36 | 306.34 | 227.32 |
| hsa-miR-182-5p  | 12.36 | 55.7   | 42.62  |
| hsa-miR-200c-3p | 12.36 | 41.77  | 56.83  |
| hsa-miR-326     | 12.36 | 13.92  | 28.41  |
| hsa-miR-200b-3p | 12.36 | 13.92  | 14.21  |
| hsa-miR-183-5p  | 6.18  | 208.87 | 14.21  |
| hsa-miR-337-3p  | 6.18  | 55.7   | 71.04  |
| hsa-miR-1268a   | 6.18  | 13.92  | 113.66 |
| hsa-miR-193b-3p | 6.18  | 13.92  | 56.83  |
| hsa-miR-331-3p  | 6.18  | 13.92  | 56.83  |

**Additional Table S2**

**The eight most enriched miRNAs in ADSC-Exos and their primer sequences used for qRT-PCR**

| miRNA           | Primer Sequence (5 '-3')                          |
|-----------------|---------------------------------------------------|
| hsa-miR-423-5p  | AGGGGCAGAGAGCGAGACTTTAAA                          |
| hsa-miR-486-5p  | CTGTACTGAGCTGCCCCGAGAA                            |
| hsa-miR-148a-3p | TCAGTGCACTACAGAACTTTGAAAA                         |
| hsa-let-7b-5p   | CGAGTGAGGTAGTAGGTTGTGTGGTTAA                      |
| hsa-let-7i-5p   | CGAGTGAGGTAGTAGTTTGTGCTGTTAA                      |
| hsa-miR-125b-5p | CCCTGAGACCCTAACTTGTGAAA                           |
| hsa-miR-122-5p  | GTGGAGTGTGACAATGGTGTTTGAAA                        |
| hsa-miR-26a-5p  | TTCAAGTAATCCAGGATAGGCTAAA                         |
| U6              | F: CTCGC TTCGGCAGCACA<br>R: AACGCTTCACGAAT TTGCGT |

### **Availability of data and materials**

MiRNA-seq data of ADSC-exos generated in this study can be accessed via Genome Sequence Archive, The assigned accession of the submission is: HRA002994 (<https://bigd.big.ac.cn/gsa-human/browse/HRA002994>). The datasets of current study are available from the corresponding author for reasonable request.
